# Supplementary material for: Bulliform Phytolith Size of Rice and Its Correlation With Hydrothermal Environment: A Preliminary Morphological Study on Species in Southern China
Source: Front Plant Sci. 2019 Aug 22;10:1037. doi: 10.3389/fpls.2019.01037 (PMC6735168; doi:10.3389/fpls.2019.01037)
Supplement: Datasheet S1 — Morphometric data of bulliform phytoliths from the 24 studied samples. [file DataSheet_1.xls]

## Sheet: Oryza sativa-AA31-Wuhan
No.	VL	HL
1	36.195	31.495
2	38.548	31.454
3	32.36	28.215
4	36.797	28.739
5	36.07	29.174
6	35.244	30.885
7	40.89	31.592
8	41.764	32.83
9	34.446	32.946
10	40.953	33.175
11	33.99	33.298
12	38.442	34.472
13	37.385	34.941
14	45.488	35.035
15	43.209	35.245
16	40.453	37.842
17	43.078	38.281
18	45.705	39.035
19	36.814	26.216
20	32.706	26.943
21	39.119	30.793
22	37.539	30.844
23	37.607	31.047
24	43.316	31.677
25	37.463	33.31
26	40.559	33.369
27	37.256	34.926
28	40.983	35.599
29	38.489	36.18
30	41.302	36.198
31	40.176	36.577
32	38.896	36.682
33	39.007	37.327
34	51.224	37.841
35	39.074	38.067
36	42.38	38.073
37	38.259	39.399
38	44.998	41.762
39	47.785	43.037
40	39.896	43.84
41	50.665	46.598
42	49.263	50.274
43	28.259	31.343
44	35.932	31.623
45	35.642	32.594
46	42.638	34.416
47	43.214	34.671
48	34.945	34.797
49	41.371	35.062
50	41.82	36.501
51	46.329	36.524
52	42.417	36.95
53	41.688	37.845
54	39.65	38.323
55	44.61	40.401
56	49.97	40.888
57	49.078	40.898
58	36.32	42.327
59	46.431	42.944
60	43.312	43.912
61	44.034	46.602
62	54.947	48.567
63	54.749	51.787
64	36.46	32.322
65	41.361	34.636
66	43.887	35.213
67	40.024	35.468
68	39.23	36.095
69	45.988	38.145
70	42.565	38.472
71	43.387	38.805
72	45.534	38.851
73	44.13	38.859
74	41.144	39.589
75	49.335	40.161
76	48.896	40.771
77	46.474	41.233
78	49.924	42.555
79	49.734	45.484
80	50.42	46.659
81	51.466	49.478
82	54.503	49.994
83	39.483	33.293
84	40.678	37.979
85	47.467	38.816
86	49.745	39.409
87	42.513	40.587
88	46.737	43.517
89	54.14	45.265
90	55.397	50.834
91	40.553	32.478
92	42.226	33.594
93	47.222	38.073
94	49.322	42.309
95	49.95	42.728
96	55.846	55.251
97	46.241	38.498
98	51.32	41.84
99	46.334	42.88
100	56.932	48.754
101	56.13	61.955
102	49.829	42.539

## Sheet: Oryza sativa-AA36-Wuhan
No.	VL	HL
1	44.086	34.013
2	37.899	29.245
3	41.645	25.642
4	35.126	30.034
5	42.344	26.688
6	35.724	28.999
7	31.822	29.492
8	37.412	31.548
9	45.038	34.663
10	40.234	31.366
11	32.959	25.636
12	30.884	23.634
13	38.949	31.009
14	36.477	31.394
15	43.535	38.555
16	32.305	28.607
17	46.037	33.216
18	32.871	34.948
19	29.528	23.452
20	35.862	25.366
21	38.915	40.551
22	41.289	32.332
23	31.828	27.523
24	30.938	32.749
25	51.032	37.785
26	41.973	35.048
27	34.636	28.612
28	35.03	34.748
29	34.106	31.83
30	45.599	43.519
31	31.583	27.251
32	41.449	38.975
33	39.86	47.432
34	38.251	31.637
35	33.085	32.131
36	34.591	26.878
37	40.106	34.948
38	40.507	42.845
39	48.777	51.794
40	34.261	31.408
41	35.108	27.7
42	39.587	29.614
43	37.869	32.296
44	40.598	31.289
45	30.113	26.337
46	46.14	35.707
47	36.167	31.79
48	37.812	31.944
49	38.672	30.682
50	44.9	42.014
51	39.938	34.716
52	48.721	38.081
53	43.27	36.687
54	38.136	35.867
55	46.911	37.081
56	34.828	26.932
57	37.499	34.131
58	38.478	27.337
59	37.794	29.941
60	38.938	27.212
61	44.857	37.56
62	43.455	38.505
63	41.532	45.667
64	53.776	46.728
65	38.405	38.207
66	37.599	31.527
67	50.863	43.224
68	39.556	34.692
69	32.728	27.487
70	44.009	33.778
71	41.826	37.33
72	33.222	31.394
73	30.24	28.007
74	36.951	32.149
75	35.415	32.767
76	47.801	48.621
77	45.351	42.644
78	37.059	30.213
79	40.878	33.25
80	37.599	33.372
81	45.766	44.886
82	50.317	43.535
83	40.237	29.696
84	49.922	44.064
85	30.424	27.134
86	52.729	43.729
87	37.04	36.597
88	47.497	44.607
89	44.847	33.386
90	36.908	30.166
91	46.733	39.356
92	40.72	42.361
93	37.876	32.716
94	40.333	36.908
95	45.11	35.368
96	50.89	35.358
97	60.268	56.396
98	52.598	41.705
99	46.862	37.474
100	48.255	59.496
101	50.114	33.923
102	37.867	40.036

## Sheet: Oryza sativa-AA37-Wuhan
No.	VL	HL
1	32.344	23.017
2	32.334	25.86
3	39.281	29.44
4	29.982	24.479
5	33.615	27.439
6	33.94	30.678
7	38.82	30.878
8	38.6	33.842
9	37.418	34.384
10	44.801	37.548
11	52.52	42.741
12	33.326	26.636
13	31.687	27.434
14	41.787	27.926
15	40.703	29.349
16	34.461	29.489
17	39.342	30.212
18	36.224	30.52
19	39.937	31.85
20	38.018	32.293
21	44.31	32.39
22	40.771	33.716
23	44.947	34.031
24	39.987	34.288
25	39.869	34.776
26	46.834	35.349
27	45.196	35.677
28	44.367	36.317
29	40.513	36.394
30	36.886	36.478
31	42.212	38.293
32	46.9	41.424
33	56.34	46.93
34	41.604	28.625
35	32.933	31.07
36	41.486	32.236
37	36.219	32.342
38	49.121	33.143
39	40.797	34.064
40	40.561	34.075
41	41.377	34.075
42	40.256	34.306
43	44.941	34.51
44	44.17	35.51
45	48.43	35.877
46	41.602	36.621
47	42.936	38.66
48	48.549	38.721
49	47.022	39.179
50	48.902	39.604
51	56.078	42.657
52	55.913	46.466
53	32.453	24.43
54	35.115	26.494
55	32.494	27.664
56	42.464	29.305
57	44.171	30.693
58	39.223	30.872
59	41.232	31.007
60	43.236	31.273
61	38.571	31.353
62	44.528	32.702
63	44.145	33.811
64	38.531	33.958
65	48.685	34.282
66	45.12	34.441
67	39.621	35.632
68	45.932	35.732
69	39.304	35.739
70	46.46	36.67
71	45.224	37.4
72	47.171	37.495
73	45.076	37.716
74	45.582	38.799
75	45.81	38.945
76	46.84	39.332
77	48.885	39.776
78	51.222	39.885
79	49.606	41.24
80	48.271	42.007
81	49.346	42.555
82	48.143	46.581
83	57.771	47.677
84	45.617	31.805
85	44.707	35.723
86	41.709	36.271
87	47.937	36.863
88	43.412	40.164
89	47.19	40.431
90	51.025	45.25
91	41.359	47.8
92	44.04	48.36
93	53.738	49.854
94	48.938	50.361
95	42.393	37.205
96	47.237	37.282
97	43.484	38.302
98	44.208	40.073
99	51.654	42.714
100	53.939	43.847
101	55.442	48.355
102	59.242	49.408

## Sheet: Oryza sativa-AA38-Wuhan
No.	VL	HL
1	32.67	24.861
2	28.139	25.639
3	30.14	26.312
4	25.249	21.786
5	32.373	26.054
6	28.313	27.321
7	34.491	28.478
8	31.666	29.696
9	35.609	32.537
10	38.22	34.613
11	37.651	35.652
12	39.652	36.75
13	33.162	36.87
14	38.209	24.842
15	31.711	27.599
16	34.845	28.258
17	35.24	28.503
18	31.573	28.787
19	33.436	30.885
20	34.12	31.251
21	38.18	32.343
22	38.306	34.08
23	43.75	37.14
24	42.312	40.83
25	34.436	23.133
26	30.604	25.252
27	33.047	26.188
28	34.126	27.549
29	37.042	27.94
30	31.96	27.966
31	35.026	28.489
32	34.949	29.443
33	36.59	29.736
34	34.769	30.523
35	37.228	31.245
36	40.311	31.407
37	34.456	32.514
38	39.575	32.831
39	38.123	33.018
40	34.925	33.147
41	35.899	33.4
42	41.293	35.129
43	39.756	37.328
44	33.033	37.371
45	35.022	37.832
46	45.973	45.683
47	30.52	24.773
48	34.743	27.442
49	34.036	29.295
50	38.694	29.459
51	34.078	30.616
52	37.055	31.997
53	33.338	32.33
54	40.251	33.699
55	34.672	34.188
56	47.323	35.391
57	34.446	35.507
58	43.843	35.61
59	41.072	35.657
60	38.379	35.824
61	44.045	38.755
62	46.005	43.559
63	38.631	28.873
64	29.437	29.025
65	39.554	30.202
66	40.715	30.685
67	33.163	30.903
68	35.582	32.293
69	39.794	32.302
70	39.018	32.34
71	44.559	32.667
72	39.746	33.059
73	37.39	33.497
74	34.862	34.16
75	40.374	35.232
76	42.169	35.384
77	41.198	35.541
78	39.146	36.291
79	36.555	32.329
80	41.091	32.36
81	41.47	33.118
82	39.08	33.406
83	41.193	33.583
84	42.421	35.218
85	44.756	35.352
86	36.186	35.639
87	43.891	38.827
88	47.277	38.833
89	47	39.605
90	47.962	34.885
91	46.185	35.475
92	44.801	36.453
93	40.111	36.882
94	36.62	37.978
95	43.455	38.399
96	41.435	39.134
97	41.716	39.342
98	39.998	40.333
99	38.002	31.45
100	37.583	32.565
101	41.479	35.091

## Sheet: Oryza sativa-AA48-Wuhan
No.	VL	HL
1	33.575	20.941
2	33.462	24.946
3	35.669	25.406
4	34.214	26.923
5	33.961	27.243
6	40.975	28.304
7	41.216	30.499
8	41.225	30.767
9	33.856	30.861
10	42.736	38.149
11	31.761	21.083
12	34.24	24.44
13	41.615	25.458
14	39.064	27.251
15	30.008	27.506
16	42.756	28.053
17	40.475	29.636
18	41.051	30.356
19	40.48	31.023
20	32.026	31.105
21	34.885	31.117
22	40.515	31.81
23	46.591	32.278
24	33.637	32.662
25	43.277	33.569
26	52.187	33.928
27	33.365	34.696
28	38.147	35.659
29	42.269	35.66
30	39.296	35.91
31	52.508	36.602
32	45.423	39.299
33	30.81	26.183
34	34.204	26.211
35	33.337	26.588
36	36.97	28.866
37	32.494	29.165
38	33.636	29.211
39	35.191	29.752
40	35.009	29.765
41	32.697	30.177
42	38.632	30.207
43	36.015	30.463
44	40.904	30.469
45	33.166	30.615
46	38.174	30.673
47	36.414	30.733
48	42.231	30.822
49	34.565	31.133
50	32.965	31.313
51	29.916	31.324
52	34.825	31.587
53	41.09	31.827
54	35.608	31.876
55	38.132	33.095
56	38.912	33.207
57	38.028	33.405
58	41.105	33.556
59	34.775	33.616
60	41.667	35.968
61	33.984	36.155
62	44.248	36.934
63	47.006	37.467
64	44.432	37.593
65	41.389	39.998
66	54.749	41.029
67	39.144	29.922
68	36.087	30.067
69	36.775	30.116
70	41.83	30.308
71	38.394	31.105
72	40.041	31.242
73	39.324	31.344
74	32.944	31.589
75	40.452	31.887
76	40.061	33.262
77	48.543	33.447
78	36.593	33.555
79	48.137	34.194
80	41.233	35.272
81	39.738	35.494
82	42.353	35.568
83	49.505	37.857
84	45.136	39.24
85	46.324	42.432
86	52.572	45.192
87	51.014	48.541
88	59.498	50.858
89	36.743	30.716
90	37.394	31.465
91	39.37	32.551
92	43.776	35.683
93	40.116	36.643
94	47.068	37.502
95	38.159	37.834
96	44.747	38.699
97	48.655	40.157
98	53.03	42.717
99	45.219	34.202
100	49.563	38.912
101	51.429	39.282
102	48.691	36.191

## Sheet: Oryza sativa-AA49-Wuhan
No.	VL	HL
1	34.58	22.526
2	34.878	24.248
3	36.814	26.372
4	39.815	33.618
5	29.184	25.837
6	48.105	27.624
7	37.653	29.093
8	37.279	33.067
9	40.468	35.428
10	45.006	36.513
11	49.969	40.658
12	42.814	42.712
13	42.235	44.982
14	38.74	28.018
15	35.988	29.899
16	37.494	30.381
17	41.234	30.626
18	37.065	31.863
19	32.488	32.176
20	39.693	32.627
21	31.621	32.629
22	40.092	33.546
23	38.358	34.978
24	42.809	37.292
25	46.307	38.249
26	48.327	38.287
27	43.304	39.547
28	45.528	40.496
29	38.208	24.819
30	42.814	27.735
31	36.131	28.228
32	39.857	29.012
33	33.781	29.185
34	37.031	29.335
35	36.493	29.45
36	40.309	29.719
37	34.936	30.264
38	39.405	30.98
39	35.995	32.814
40	38.153	33.615
41	43.955	34.059
42	40.513	34.287
43	40.616	34.796
44	42.617	35.299
45	41.275	35.959
46	42.117	36.085
47	50.956	37.288
48	40.672	37.3
49	34.351	39.203
50	47.899	39.513
51	49.095	42.198
52	51.851	43.065
53	42.965	44.597
54	45.65	50.201
55	37.273	31.162
56	39.536	32.118
57	42.225	32.629
58	43.299	33.005
59	37.718	33.027
60	40.562	33.2
61	38.74	33.226
62	33.499	33.236
63	45.06	33.282
64	49.567	34.563
65	38.054	35.142
66	45.305	36.089
67	54.201	36.32
68	49.251	36.547
69	39.907	36.619
70	43.912	36.851
71	37.438	37.276
72	36.557	38.354
73	47.295	39.054
74	50.101	39.835
75	44.374	42.414
76	49.005	43.309
77	48.837	43.621
78	45.165	45.626
79	55.066	49.133
80	35.398	28.985
81	37.526	31.518
82	44.054	31.903
83	43.837	32.176
84	39.773	34.773
85	40.255	35.166
86	42.626	35.718
87	52.664	38.978
88	47.432	39.65
89	46.894	41.776
90	45.375	42.508
91	48.52	45.78
92	50.178	46.583
93	42.164	33.301
94	38.822	35.12
95	44.982	35.443
96	49.27	38.002
97	55.945	50.094
98	41.789	29.474
99	43.892	35.341
100	53.237	43.58

## Sheet: Oryza rufipogon-Z1-Wuhan
No.	VL	HL
1	26.576	16.596
2	34.407	21.172
3	33.627	21.792
4	37.417	22.022
5	24.947	22.39
6	32.459	22.522
7	35.642	23.414
8	38.286	23.832
9	33.87	24.769
10	34.149	24.9
11	39.242	25.048
12	31.011	25.487
13	33.243	25.626
14	32.252	25.695
15	32.679	26.146
16	39.671	26.332
17	35.015	26.384
18	34.425	26.601
19	31.226	27.357
20	39.995	27.377
21	34.559	27.547
22	32.939	27.845
23	30.337	27.863
24	34.239	27.871
25	33.537	28.168
26	36.136	28.179
27	29.096	28.694
28	32.397	28.783
29	40.052	28.919
30	37.082	29.253
31	37.022	29.451
32	27.176	29.596
33	40.732	29.783
34	38.275	29.836
35	40.272	30.175
36	35.083	30.289
37	33.668	30.435
38	39.419	30.709
39	42.148	30.789
40	42.704	30.8
41	33.543	30.835
42	32.967	30.903
43	38.617	30.926
44	32.149	31.46
45	39.996	31.707
46	41.176	31.709
47	46.644	31.732
48	35.214	31.82
49	39.046	32.093
50	37.898	32.239
51	35.605	32.379
52	40.436	32.536
53	36.336	32.767
54	35.894	32.859
55	34.975	32.915
56	36.948	33.108
57	44.451	33.117
58	32.046	33.144
59	36.446	33.505
60	32.29	33.662
61	33.924	34.092
62	32.726	34.104
63	35.626	34.187
64	42.954	34.259
65	35.389	34.522
66	38.812	34.608
67	38.28	34.681
68	40.434	34.741
69	43.09	34.754
70	31.826	34.942
71	39.246	34.981
72	44.125	35.128
73	35.953	35.354
74	46.573	35.426
75	44.833	35.601
76	42.96	35.691
77	40.436	35.882
78	39.138	36.029
79	37.169	36.037
80	44.599	36.073
81	45.872	36.884
82	38.621	36.95
83	41.891	36.979
84	37.971	36.995
85	38.607	37.413
86	41.819	37.543
87	44.085	37.552
88	47.123	38.554
89	43.109	38.627
90	37.598	39.002
91	45.561	39.245
92	40.571	40.138
93	39.193	40.163
94	40.437	40.379
95	44.98	41.659
96	53.642	42.167
97	46.469	42.186
98	48.834	42.28
99	44.738	42.723
100	36.999	44.516
101	40.536	45.826

## Sheet: Oryza rufipogon-Z12-Wuhan
No.	VL	HL
1	32.327	31.446
2	33.214	24.524
3	27.901	29.068
4	26.423	20.725
5	33.431	21.229
6	35.035	23.088
7	34.49	24.197
8	30.71	25.461
9	36.321	26.452
10	34.037	26.786
11	35.66	27.017
12	32.635	27.392
13	37.637	27.484
14	34.916	28.072
15	30.08	28.56
16	29.127	30.643
17	36.388	21.35
18	30.032	24.372
19	28.534	25.775
20	28.441	26.319
21	34.416	26.744
22	32.374	27.037
23	30.3	27.135
24	41.222	27.16
25	37.918	27.215
26	33.42	29.138
27	33.339	29.33
28	44.063	31.778
29	37.85	31.839
30	34.391	32.86
31	44.176	32.901
32	37.706	36.803
33	29.631	23.599
34	30.312	26.188
35	36.708	26.604
36	29.322	26.698
37	35.379	26.7
38	31.119	26.964
39	34.493	27.578
40	34.136	28.02
41	36.143	28.701
42	33.818	28.75
43	36.572	28.826
44	39.208	28.869
45	34.496	29.004
46	30.996	29.073
47	29.864	29.229
48	35.075	30.098
49	35.193	30.574
50	36.757	31.884
51	39.745	32.36
52	41.552	33.762
53	33.516	35.72
54	48.704	37.297
55	38.311	37.4
56	50.718	48.655
57	32.757	24.938
58	38.362	25.653
59	33.611	26.398
60	32.362	26.926
61	38.618	28.266
62	36.743	28.342
63	29.632	28.639
64	35.107	28.658
65	40.523	29.642
66	41.25	29.768
67	39.139	31.05
68	39.142	33.348
69	40.328	33.5
70	38.003	34.244
71	39.529	36.052
72	34.575	37.168
73	42.121	38.114
74	48.942	40.457
75	34.853	26.795
76	31.031	27.125
77	36.799	27.231
78	37.109	28.495
79	36.68	30.306
80	40.644	30.36
81	37.077	30.404
82	33.436	32.098
83	43.555	32.199
84	46.507	32.551
85	43.667	32.728
86	39.112	33.88
87	39.861	35.2
88	42.878	35.674
89	45.868	36.751
90	47.959	36.933
91	47.282	40.535
92	46.504	44.378
93	43.692	45.062
94	37.685	29.839
95	37.746	30.311
96	37.426	32.626
97	40.628	34.006
98	34.295	34.11
99	42.163	34.508
100	45.189	40.955
101	48.734	42.762
102	50.781	33.326

## Sheet: Oryza rufipogon-Z13-Wuhan
No.	VL	HL
1	23.784	15.54
2	22.728	15.709
3	23.638	16.256
4	33.324	17.198
5	22.183	17.351
6	23.372	17.601
7	27.412	17.673
8	27.015	18.122
9	23.795	18.346
10	23.145	18.743
11	25.57	18.88
12	24.913	19.209
13	25.525	19.221
14	24.024	19.34
15	27.37	19.34
16	21.3	19.795
17	32.966	19.93
18	28.12	20.216
19	31.344	20.242
20	27.184	20.378
21	28.305	20.475
22	33.415	20.874
23	29.188	21.166
24	26.187	21.306
25	27.121	21.317
26	31.167	21.503
27	25.204	21.545
28	27.415	21.802
29	28.416	21.87
30	24.846	21.926
31	26.594	22.152
32	25.421	22.277
33	27.411	22.792
34	22.909	22.994
35	33.708	22.995
36	27.63	23.02
37	31.603	23.027
38	31.491	23.102
39	23.743	23.401
40	26.084	23.577
41	27.312	23.666
42	26.961	23.686
43	30.845	23.722
44	30.182	23.77
45	30.534	23.782
46	35.478	23.947
47	32.769	23.986
48	29.971	24.122
49	25.261	24.138
50	31.362	24.233
51	30.801	24.347
52	28.68	24.35
53	28.677	24.364
54	30.323	24.383
55	30.025	24.493
56	32.696	24.51
57	30.663	24.632
58	29.604	25.034
59	27.568	25.089
60	30.776	25.16
61	30.075	25.242
62	30.249	25.296
63	29.62	25.402
64	30.463	25.525
65	30.672	25.555
66	30.877	25.631
67	29.811	25.687
68	36.229	25.731
69	33.659	25.86
70	32.688	26.209
71	32.661	26.335
72	31.552	26.354
73	37.091	26.397
74	31.205	26.424
75	32.431	26.425
76	35.249	26.456
77	32.319	26.635
78	31.75	26.641
79	32.122	26.835
80	27.806	26.865
81	28.897	26.891
82	34.531	26.937
83	28.089	27.047
84	30.228	27.223
85	34.519	27.926
86	28.831	28.387
87	35.369	28.895
88	32.483	28.976
89	34.517	29.05
90	31.371	29.157
91	34.292	29.972
92	32.464	30.106
93	29.466	30.131
94	34.137	30.455
95	29.464	30.819
96	36.696	31.412
97	35.579	31.546
98	33.34	31.64
99	39.847	31.673
100	38.605	32.794
101	40.699	32.968

## Sheet: Oryza rufipogon-Z14-Wuhan
No.	VL	HL
1	28.052	22.928
2	32.363	26.763
3	34.233	32.423
4	41.19	38.287
5	30.976	18.804
6	26.104	22.606
7	30.743	23.715
8	39.202	29.267
9	34.03	29.709
10	34.287	29.813
11	33.727	34.729
12	41.637	43.934
13	30.98	20.2
14	30.121	25.435
15	34.975	27.049
16	31.054	27.832
17	33.773	28.388
18	30.609	31.243
19	34.275	31.525
20	31.919	33.539
21	30.877	34.256
22	32.21	34.305
23	36.156	34.982
24	36.566	35.419
25	35.008	35.504
26	37.691	37.092
27	39.218	38.721
28	44.18	40.831
29	30.413	21.111
30	28.425	21.979
31	33.176	25.908
32	35.542	26.11
33	29.433	28.669
34	34.538	29.191
35	30.174	29.786
36	35.292	30.12
37	33.34	30.523
38	31.245	30.67
39	32.541	33.547
40	37.766	34.806
41	36.205	35.043
42	41.722	35.156
43	40.366	35.159
44	42.209	35.385
45	39.076	35.853
46	42.832	38.812
47	41.378	40.568
48	37.256	41.274
49	43.378	42.039
50	45.635	42.455
51	28.888	28.032
52	39.335	28.125
53	34.036	28.344
54	35.745	28.581
55	28.115	29.225
56	35.623	29.943
57	35.166	30.325
58	33.136	30.942
59	33.748	31.33
60	35.342	31.727
61	35.836	33.886
62	41.611	34.77
63	40.944	34.796
64	40.439	35.743
65	40.088	36.114
66	41.843	36.157
67	37.365	36.721
68	34.555	37.201
69	36.952	37.224
70	45.385	38.457
71	42.152	38.969
72	41.767	39.692
73	42.838	40.563
74	28.813	29.972
75	33.474	31.538
76	32.53	31.727
77	31.826	31.985
78	34.756	32.113
79	35.185	33.847
80	39.14	34.591
81	34.108	36.178
82	32.532	36.603
83	43.312	37.631
84	34.065	38.879
85	44.794	42.073
86	33.938	28.829
87	32.533	29.858
88	33.951	33.666
89	36.104	36.404
90	36.368	36.832
91	46.722	38.019
92	52.897	44.875
93	42.254	32.028
94	34.699	33.264
95	36.093	34.598
96	37.687	36.058
97	42.293	37.437
98	41.549	39.041
99	41.001	36.256
100	47.326	40.314
101	42.584	40.566
102	46.573	42.291
103	38.658	33.176
104	49.246	44.666
105	48.596	42.17

[truncated: 14 more sheets: Oryza rufipogon-Z15-Wuhan, Oryza rufipogon-Z23-Wuhan, Oryza rufipogon-Z27-Wuhan, Oryza rufipogon-Z41-Wuhan, Oryza rufipogon-HL-3-Hainan, Oryza rufipogon-WN-7-Hainan, Oryza rufipogon-TS-1-Hainan, Oryza rufipogon-YNY-1-Yuanjiang, Oryza rufipogon-P4-Chaling, Oryza rufipogon-DXS1-Dongxiang, Oryza rufipogon-DXA1-Dongxiang, Oryza rufipogon-XSBN-XishuangBN, Oryza meyeriana-LHT-1-Hainan, Oryza officinalis-ZX345-Hainan]
